1 **Reasons underlying the intention to vaccinate children aged 5-11 against COVID-19: A**  
2 **cross-sectional study of parents in Israel, November 2021**

3  
4 **Authors:**

5 Nicole G. Morozov<sup>1</sup>, Amiel A. Dror<sup>2,3\*</sup>, Amani Daoud<sup>2,3</sup>; Netanel Eisenbach<sup>2,3</sup>; Edward  
6 Kaykov<sup>3,4</sup>; Masad Barhoum<sup>3,5</sup>; Tsvi Sheleg<sup>3,5</sup>; Michael Edelstein<sup>3</sup>

7  
8 \*Morozov and Dror are equal first authors

9  
10 <sup>1</sup>Tel Aviv University, Tel Aviv, Israel

11 <sup>2</sup>Department of Otolaryngology, Head and Neck Surgery, Galilee Medical Center, Nahariya,  
12 Israel

13 <sup>3</sup>The Azrieli Faculty of Medicine, Bar-Ilan University, Safed, Israel

14 <sup>4</sup>Geriatric Medicine Department, Galilee Medical Center, Nahariya, Israel

15 <sup>5</sup>Galilee Medical Center, Nahariya, Israel

16  
17 \*Corresponding author: Amiel A. Dror, Department of Otolaryngology, Head and Neck Surgery,  
18 Galilee Medical Center, Nahariya, Israel; Azrieli Faculty of Medicine, Bar-Ilan University,  
19 Safed, Israel Tel: +972544530534; email: amieldror@gmail.com

20

21

22

23

24 **Abstract**

25

26 **Background**

27 Vaccination is a key tool to mitigate the impact of the COVID-19 pandemic. In Israel, COVID-  
28 19 vaccines became available to adults in December 2020 and to 5–11-year-old children in  
29 November 2021. Ahead of the vaccine roll-out in children, we aimed to determine whether  
30 parents intended to vaccinate their children and describe reasons for their intentions.

31

32 **Methods**

33 We recruited parents on social media and collected information on parental socio-demographic  
34 characteristics, COVID-19 vaccine history, intention to vaccinate their children against COVID-  
35 19, and reasons for parental decisions, using an anonymous online survey. We identified  
36 associations between parental characteristics and intention to vaccinate children using a logistic  
37 regression model and described reasons for intentions to vaccinate or not using proportions  
38 together with 95% confidence intervals (CI).

39

40 **Results**

41 1837 parents participated. Parental non-vaccination and having experienced major vaccination  
42 side effects were strongly associated with non-intention to vaccinate their children (OR 0.09 and  
43 0.18 respectively,  $p < 0.001$ ). Compared with others, parents who were younger, lived in the  
44 socio-economically deprived periphery, and belonged to the Arab population had lower  
45 intentions to vaccinate their children. Commonly stated reasons for non-intention to vaccinate  
46 included vaccine safety and efficacy (53%, 95%CI 50-56) and the belief that COVID-19 was a

47 mild disease (73%, 95%CI 73-79). The most frequently mentioned motives for intending to  
48 vaccinate children was returning to normal social and educational life (89%, 95%CI 87-91).

49

## 50 **Conclusion**

51 Parental socio-demographic background and their own vaccination experience was associated  
52 with intention to vaccinate their children aged 5-11. Intention to vaccinate was mainly for social  
53 and economic reasons rather than health, whereas non-intention to vaccinate mainly stemmed  
54 from health concerns. Understanding rationales for COVID-19 vaccine rejection or acceptance,  
55 as well as parental demographic data, can pave the way for intentional educational campaigns to  
56 encourage not only vaccination against COVID-19, but also regular childhood vaccine  
57 programming.

58

59 **Keywords:** COVID-19; vaccine hesitancy; childhood vaccines; parental vaccine hesitancy

60

## 61 **Highlights**

- 62 • Parental intention to vaccinate 5-11 children is much lower than vaccine coverage in  
63 parental age groups
- 64 • Being unvaccinated and having experienced side effects following vaccination were the  
65 greatest negative predictors in parents of intention to vaccinate their children
- 66 • Parents were more likely to accept a COVID-19 vaccine for their children to allow them  
67 to return to daily social life and to ensure economic security in the family
- 68 • Parents were more likely to reject a COVID-19 vaccination for health reasons such as  
69 safety concerns or due the belief that COVID-19 was a mild disease in children

70 **Introduction**

71

72 The rapid, global spread of COVID-19, an infection caused by the SARS-CoV-2 virus, spurred  
73 the expeditious development of several vaccines and the eventual implementation of vaccine  
74 programs at record speeds. In Israel, COVID-19 vaccines became available in December 2020  
75 for adults and eligibility gradually extended to younger ages. Teenagers aged 12-15 became  
76 eligible in June 2021 and children aged 5-11 in November 2021. Most high-income countries  
77 now offer teenage vaccination, but vaccination of younger children is less common despite  
78 evidence of its safety and effectiveness [1]. Outside of Israel, the United States' (USA) Centers  
79 for Disease Control and Prevention (CDC) recommends vaccination in the 5-11 age group while  
80 the European Centre for Disease prevention and Control has also recommended considering  
81 universal vaccination in this demographic [2, 3].

82

83 The short period between the pandemic's onset and vaccine availability has added additional  
84 challenges for vaccine acceptance among the public [4]. Almost two years after the onset of the  
85 pandemic and one year after the first administration of COVID-19 vaccines in adults, the USA's  
86 Food and Drug Administration (FDA) approved the Pfizer/BioNTech mRNA vaccine for 5- to  
87 11-year-old children [1, 5]. Studies conducted in the UK, USA, and Canada suggest that many  
88 parents remain concerned about the vaccine's side effects and safety, leading parents to be  
89 hesitant to administer the COVID-19 vaccine to their children [6-8]. Research has not yet  
90 examined the reasons why parents would be motivated or hesitant to vaccinate their children in  
91 Israel.

92

93 Demographic criteria which have been associated with higher rates of vaccine refusal for  
94 children include younger parental age, non-white or minority ethnicity, lower education level,  
95 history of vaccination non-compliance to recommended childhood vaccinations, and lower  
96 income [7, 9-11]. Parents concerned about future finances were more likely to accept a  
97 vaccination for their offspring [11]. Attitudes and behaviors towards vaccination also tend to be  
98 specific to the vaccine in question and to each country [12]. Compared with most high-income  
99 countries, Israel typically achieves high coverage for routine childhood vaccines. The 2020  
100 national coverage for the first MMR dose among 24-month-olds was 99% in Israel vs 91% in the  
101 United States and in the UK [13]. In addition, Israel's largest ethnic minority typically achieves  
102 higher coverage for routine childhood vaccines compared with the general population [14]. It is,  
103 therefore, important to understand and document attitudes to COVID-19 vaccination in different  
104 contexts due to the implications for public health interventions.

105  
106 We aimed to investigate the intentions of parents in Israel to vaccinate their 5-11-year-old  
107 children against COVID-19 and the underlying reasons for their intentions. We sought to  
108 determine what common reasons parents listed for accepting or rejecting vaccinating their  
109 children. Our survey was initiated two weeks before children in this age group became eligible  
110 for COVID-19 vaccination.

111

## 112 **Methods**

113

### 114 **Study design**

115

116 This study was designed as a cross sectional survey to understand the general populations'  
117 willingness to vaccinate their children against COVID-19 and the reasons for their acceptance or  
118 refusal of the vaccine using an online questionnaire in Hebrew and Arabic and distributed  
119 through social media channels (Facebook and Twitter). Informed consent was requested on the  
120 introductory page of the online questionnaire, prior to survey enrollment. The anonymous web-  
121 based survey followed the American Association for Public Opinion Research (AAPOR)  
122 reporting guidelines [15]. The survey was anonymous and no identifiable information was  
123 collected. Participants were permitted to terminate participation at will. Approval of this study  
124 was granted by the Research Ethics Committee of the Galilee Medical Center. The questionnaire  
125 was designed and distributed using Qualtrics (Qualtrics, Provo, UT, United States of America).

126

#### 127 **Data collection**

128

129 The survey had two sections: The first part included nine questions about socio-demographic  
130 characteristics of the participating parents including parental age, gender, area of residence,  
131 household composition, number of children, ethnicity, parental education, parental COVID-19  
132 vaccination status, and self-reported side effects from the vaccine (major, mild, or no symptoms),  
133 and one question on intention to vaccinate their child(ren) against COVID-19.

134

135 In the second section, responders who indicated they were not intending to vaccinate their  
136 children against COVID-19 were asked to state their reasons from a list of predefined  
137 explanations, and those who indicated intention to vaccinate were also asked to affirm why from  
138 a list of potential reasons. A free text answer was also provided.

139

140 The full questionnaire is available in Appendix 1. The estimated answering time for completing  
141 the survey was under two minutes.

142

### 143 **Statistical analysis**

144

145 We calculated the proportion of parents intending to vaccinate their children together with 95%  
146 confidence intervals, overall and in each stratum. We compared parents who intended to  
147 vaccinate their children to those who did not in terms of all socio-demographic factors recorded  
148 in the questionnaire using a univariate logistic regression model. In order to determine the extent  
149 to which each factor was an independent predictor, we conducted a multivariate logistic  
150 regression analysis adjusting for all other factors found to be statistically significant (at the  
151  $\alpha=0.05$  level) in the univariate analysis. We also calculated the proportion of parents giving  
152 each reason for intending or not intending to vaccinate together with 95% confidence intervals.

153

154 Data were prepared using Microsoft Excel and analyzed using STATA 15.

155

### 156 **Results**

157

158 We received 1837 responses to our survey between November 1-14, 2021. Of those, 1514  
159 (82.4%) completed the survey in its entirety. The distribution of responders according to age,  
160 sex, ethnicity, education level, and other demographic criteria is described in Table 1. Overall  
161 intention to vaccinate was 44% (95% CI 41.3-45.9).

162  
163 Female parents and parents above the age of 35 were more likely to vaccinate than male parents  
164 and parents aged 35 and younger (47% vs. 40%,  $p<0.002$ ; 45% vs. 39%,  $p<0.02$ , Table 1).  
165 Compared with non-Arab Israeli parents, Israeli Arab parents reported a lower intention to  
166 vaccinate their children (34% vs. 47%,  $p<0.001$ , Table 1). Other parental factors significantly  
167 associated with a lower intention to vaccinate included having a single child, living in the  
168 periphery (Northern or Southern, socioeconomically depressed regions of the country), having  
169 received fewer than three doses of a COVID-19 vaccine and having experienced major side  
170 effects of COVID-19 vaccination. After adjusting for other factors, being male, living in the  
171 periphery, belonging to the Arab population, reception of fewer than three doses of the COVID-  
172 19 vaccine and having experienced major side effects following COVID-19 vaccination all  
173 remained significantly associated with a lower intention to vaccinate children (Table 1). Being  
174 completely unvaccinated and having suffered major side effects were associated with the largest  
175 reduction in intention to vaccinate children (-91% and -81% respectively,  $p<0.001$ ).

176  
177 Of 801 parents intending to vaccinate their children, 93% were COVID-19 vaccinated at least  
178 once. Intention to vaccinate their children increased with the number of doses the parents had  
179 received; while only 13% of unvaccinated parents intended to vaccinate their children against  
180 COVID-19, 32% of parents vaccinated with one dose, 48% of parents vaccinated with two doses,  
181 and 62% of parents vaccinated with three doses were willing to vaccinate their children  
182 ( $p<0.001$ , Table 1).

183



184 The most often cited reason for choosing to vaccinate their children was to allow their children to  
185 return to everyday social, educational, and financial life, followed by protecting other family  
186 members from COVID-19 infection (89 and 77.9% respectively, Table 2). The protection of the  
187 children against viral COVID-19 infection followed by vaccine safety were the least often  
188 mentioned explanations for parents who intended to vaccinate their children (37.9%).

189  
190 The most frequently mentioned explanation for not vaccinating their children is the belief that  
191 COVID-19 leads to mild or asymptomatic disease in children (76.1%, Table 2). Concerns of the  
192 parents regarding vaccine safety were ordered second in their consideration not to vaccinate their  
193 children (53.1%, Table 2).

194

## 195 **Discussion**

196

197 Routine childhood vaccination offers the prospect of protection against a transmissible and  
198 infectious, but preventable, threat to health. In most settings, there is no ongoing endemic  
199 transmission of poliovirus, measles, or diphtheria infections due to effective global vaccination  
200 campaigns [16-18]. However, COVID-19 is unique in several ways: first, the pandemic is  
201 continuing to develop and therefore vaccine protection is against an immediate and tangible  
202 threat; second, the COVID-19 pandemic is the only instance in recent history that a mass  
203 vaccination campaign concurrently targets children and their parents for initiating vaccination;  
204 third, the volume and availability of information around COVID-19 vaccines, offering arguments  
205 both for and against vaccination with very few verification pathways for parents to assess the  
206 accuracy of the information they are accessing, is an unprecedented phenomenon; fourth, the speed

207 at which COVID-19 vaccines were developed have raised some concerns about safety among the  
208 general public [19, 20]

209  
210 We found that the intention to vaccinate children aged 5-11 was low, overall. Less than half of  
211 parents intended to vaccinate their 5-11 children, and as of February 2022 just over 20% had  
212 vaccinated their offspring[21]. Even among parents who had received three doses of the vaccine,  
213 intention to vaccinate was only 62%. This is consistent with experience from other countries  
214 where vaccinated parents did not intend to vaccination their children [22]. Parental experience  
215 was clearly a key factor in the decision, with unvaccinated parents and those who experienced  
216 perceived severe side effects very unlikely to vaccinate their children. Parents with higher  
217 education were not more likely to vaccinate than others.

218  
219 Our study has highlighted that the main reasons for intending to vaccinate their children were not  
220 biomedical. Our study suggests that, for COVID-19, the traditional perception of vaccination  
221 benefits such as protection against illness and abolishing the spread of infection has been  
222 superseded by indirect benefits such as returning to regular societal life and education  
223 institutions, as well as assuring financial resilience for the family. While this finding is not  
224 surprising considering the severe disruption to normal life caused by the COVID-19 pandemic, it  
225 is not clear whether this perception of the societal utility of vaccines will continue to impact the  
226 perception of other vaccines beyond the pandemic.

227  
228 Groups who may be targets for intersectional outreach include minorities, parents with a lower  
229 educational level, and families in lower financial brackets as these parents have been highlighted

230 as more likely to be vaccine hesitant [10, 23]. Our research found that Arab parents were less  
231 likely to vaccinate their children as compared to other parents, consistent with research finding a  
232 higher rate of COVID-19 vaccine hesitancy among minority communities in other countries, as  
233 well as in Israel's Arab and Ultra-Orthodox communities [7, 24, 25].

234  
235 Our study has identified that key factors within Israeli society associated with an increased  
236 intention to vaccinate children against COVID-19 include the parent's desire for the child to  
237 return to normal social and educational life along with secondary motives such as the parent's  
238 desire to maintain job security. The main drivers against intention to vaccinate are much more  
239 biomedical, encompassing beliefs that COVID-19 causes a mild disease course in children and  
240 concerns about vaccine safety. These findings have implications for health promotion and  
241 communication campaigns; ensuring parents' confidence in the safety of the vaccine and  
242 highlighting the sociocultural benefits of vaccination may be key in guiding communities to  
243 higher levels of vaccine uptake.

244  
245 Limitations of our investigation include the self-selection of participants in answering the  
246 questionnaire and the participants' self-identification of socio-demographic characteristics.  
247 Potentially, individuals who have stronger opinions either for or against vaccinating their  
248 children for COVID-19 may be more likely to complete a questionnaire about the topic. It must  
249 be noted that the age, sex, and geographical distribution of participants suggest that all segments  
250 of the population were represented.

251

252 It is not clear to what extent our findings are generalizable to other countries. Globally, there are  
253 wide discrepancies in vaccine uptake from one country to another with some countries enjoying  
254 remarkably low levels of vaccine hesitancy among parents [9, 11]. Understanding what factors  
255 enable childhood COVID-19 vaccination in countries with high parental intent and transferring  
256 this knowledge to other contexts could help countries struggling with COVID-19 childhood  
257 vaccination programs. Because a growing number of individuals, including parents, are seeking  
258 health and vaccine information online or through peers, the availability of trustworthy sources  
259 and early educational campaigns cannot be overstated [26].

260

## 261 **Conclusion**

262

263 The availability of COVID-19 vaccines and licensing of these vaccinations for use in children  
264 aged five to 11 is not a guarantee that parents will inoculate their children. Our study showed that  
265 intention to vaccinate 5- to 11-year-old children was low even among fully vaccinated parents,  
266 with socio-cultural factors, as well as vaccination experience in parents, being associated with  
267 intention to vaccinate their children. Our study showed that indirect benefits of vaccination such  
268 as returning to regular societal activities, including educational institutions and personal  
269 economic stability, were bigger motivators than direct protection against the virus, while the  
270 most common reasons for intending not to vaccinate children against COVID-19 were classical  
271 biomedical concerns such disease severity and vaccine safety. These findings are important for  
272 health authorities to shape educational and communication campaigns: focusing on the message  
273 that vaccines protect against COVID-19 may not be as effective as messages stating that

274 vaccines will allow children to go to school and adults to work. Different messaging campaigns  
275 should be implemented and evaluated to test this possibility.

276

277 **Conflicts of interest:** The authors declare no conflicts of interest.

278

279 **Attestation:** All authors attest they meet the ICMJE criteria for authorship

280

## 281 Citations

282

283 1. Walter EB, Talaat KR, Sabharwal C, Gurtman A, Lockhart S, Paulsen GC, et al.

284 Evaluation of the BNT162b2 Covid-19 Vaccine in Children 5 to 11 Years of Age. *New England*

285 *Journal of Medicine*. 2021.10.1056/NEJMoa2116298

286 2. CDC. COVID-19 Vaccination for Children 5-11 Years Old [Internet]. Centers for

287 Disease Control and Prevention. 2022 [cited 2022 Feb 19]. Available from:

288 <https://www.cdc.gov/vaccines/covid-19/planning/children.html>

289 3. Interim public health considerations for COVID-19 vaccination of children aged 5-11

290 years [Internet]. European Centre for Disease Prevention and Control. 2021 [cited 2022 Feb 19].

291 Available from: [https://www.ecdc.europa.eu/en/publications-data/interim-public-health-](https://www.ecdc.europa.eu/en/publications-data/interim-public-health-considerations-covid-19-vaccination-children-aged-5-1)

292 [considerations-covid-19-vaccination-children-aged-5-1](https://www.ecdc.europa.eu/en/publications-data/interim-public-health-considerations-covid-19-vaccination-children-aged-5-1)

293 4. Soares P, Rocha JV, Moniz M, Gama A, Laires PA, Pedro AR, et al. Factors Associated

294 with COVID-19 Vaccine Hesitancy. 2021;9(3):300

295 5. Woodworth KR, Moulia D, Collins JP, Hadler SC, Jones JM, Reddy SC, et al. The

296 Advisory Committee on Immunization Practices' Interim Recommendation for Use of Pfizer-

- 297 BioNTech COVID-19 Vaccine in Children Aged 5-11 Years - United States, November 2021.  
298 MMWR Morb Mortal Wkly Rep. 2021;70(45):1579-83.10.15585/mmwr.mm7045e1
- 299 6. Ruggiero KM, Wong J, Sweeney CF, Avola A, Auger A, Macaluso M, et al. Parents'  
300 Intentions to Vaccinate Their Children Against COVID-19. Journal of Pediatric Health Care.  
301 2021;35(5):509-17.<https://doi.org/10.1016/j.pedhc.2021.04.005>
- 302 7. Bell S, Clarke R, Mounier-Jack S, Walker JL, Paterson P. Parents' and guardians' views  
303 on the acceptability of a future COVID-19 vaccine: A multi-methods study in England. Vaccine.  
304 2020;38(49):7789-98.<https://doi.org/10.1016/j.vaccine.2020.10.027>
- 305 8. Humble RM, Sell H, Dubé E, MacDonald NE, Robinson J, Driedger SM, et al. Canadian  
306 parents' perceptions of COVID-19 vaccination and intention to vaccinate their children: Results  
307 from a cross-sectional national survey. Vaccine. 2021;39(52):7669-  
308 76.<https://doi.org/10.1016/j.vaccine.2021.10.002>
- 309 9. Bagateli LE, Saeki EY, Fadda M, Agostoni C, Marchisio P, Milani GP. COVID-19  
310 Vaccine Hesitancy among Parents of Children and Adolescents Living in Brazil. Vaccines.  
311 2021;9(10).10.3390/vaccines9101115
- 312 10. McKinnon B, Quach C, Dubé È, Tuong Nguyen C, Zinszer K. Social inequalities in  
313 COVID-19 vaccine acceptance and uptake for children and adolescents in Montreal, Canada.  
314 Vaccine. 2021;39(49):7140-5.<https://doi.org/10.1016/j.vaccine.2021.10.077>
- 315 11. Goldman RD, Krupik D, Ali S, Mater A, Hall JE, Bone JN, et al. Caregiver Willingness  
316 to Vaccinate Their Children against COVID-19 after Adult Vaccine Approval. International  
317 Journal of Environmental Research and Public Health. 2021;18(19).10.3390/ijerph181910224

- 318 12. Larson HJ, de Figueiredo A, Xiaohong Z, Schulz WS, Verger P, Johnston IG, et al. The  
319 State of Vaccine Confidence 2016: Global Insights Through a 67-Country Survey.  
320 EBioMedicine. 2016;12:295-301.10.1016/j.ebiom.2016.08.042
- 321 13. Measles vaccination coverage [Internet]. World Health Organization Available from:  
322 <https://immunizationdata.who.int/pages/coverage/mcv.html?CODE=ISR+GBR+USA&ANTIGEN=N=MCV1&YEAR=>.  
323
- 324 14. Stein-Zamir C, Israeli A. Timeliness and completeness of routine childhood vaccinations  
325 in young children residing in a district with recurrent vaccine-preventable disease outbreaks,  
326 Jerusalem, Israel. Euro surveillance : bulletin Europeen sur les maladies transmissibles =  
327 European communicable disease bulletin. 2019;24(6).10.2807/1560-7917.Es.2019.24.6.1800004
- 328 15. Transparency Initiative Disclosure Elements. American Association for Public Opinion  
329 Research; 2021
- 330 16. Obregón R, Chitnis K, Morry C, Feek W, Bates J, Galway M, et al. Achieving polio  
331 eradication: a review of health communication evidence and lessons learned in India and  
332 Pakistan. Bulletin of the World Health Organization. 2009;87(8):624-30.10.2471/blt.08.060863
- 333 17. Clarke KEN, MacNeil A, Hadler S, Scott C, Tiwari TSP, Cherian T. Global  
334 Epidemiology of Diphtheria, 2000-2017(1). Emerging infectious diseases. 2019;25(10):1834-  
335 42.10.3201/eid2510.190271
- 336 18. Holzmann H, Hengel H, Tenbusch M, Doerr HW. Eradication of measles: remaining  
337 challenges. Medical microbiology and immunology. 2016;205(3):201-8.10.1007/s00430-016-  
338 0451-4
- 339 19. The Lancet Infectious D. The COVID-19 infodemic. The Lancet Infectious diseases.  
340 2020;20(8):875.10.1016/s1473-3099(20)30565-x

- 341 20. Salerno L, Craxì L, Amodio E, Lo Coco G. Factors Affecting Hesitancy to mRNA and  
342 Viral Vector COVID-19 Vaccines among College Students in Italy. *Vaccines*.  
343 2021;9(8):10.3390/vaccines9080927
- 344 21. Health IMo. Coronavirus in Israel - general situation 2022. p.  
345 <https://datadashboard.health.gov.il/COVID-19/general>
- 346 22. Horiuchi S, Sakamoto H, Abe SK, Shinohara R, Kushima M, Otawa S, et al. Factors of  
347 parental COVID-19 vaccine hesitancy: A cross sectional study in Japan. *PloS one*.  
348 2021;16(12):e0261121.10.1371/journal.pone.0261121
- 349 23. Alfieri NL, Kusma JD, Heard-Garris N, Davis MM, Golbeck E, Barrera L, et al. Parental  
350 COVID-19 vaccine hesitancy for children: vulnerability in an urban hotspot. *BMC Public*  
351 *Health*. 2021;21(1):1662.10.1186/s12889-021-11725-5
- 352 24. Robinson E, Jones A, Lesser I, Daly M. International estimates of intended uptake and  
353 refusal of COVID-19 vaccines: A rapid systematic review and meta-analysis of large nationally  
354 representative samples. *Vaccine*. 2021;39(15):2024-  
355 34.<https://doi.org/10.1016/j.vaccine.2021.02.005>
- 356 25. Gorelik Y, Anis E, Edelstein M. Inequalities in initiation of COVID19 vaccination by age  
357 and population group in Israel- December 2020-July 2021. *The Lancet regional health Europe*.  
358 2022;12:100234.10.1016/j.lanep.2021.100234
- 359 26. Rhodes ME, Sundstrom B, Ritter E, McKeever BW, McKeever R. Preparing for A  
360 COVID-19 Vaccine: A Mixed Methods Study of Vaccine Hesitant Parents. *Journal of Health*  
361 *Communication*. 2020;25(10):831-7.10.1080/10810730.2021.1871986
- 362
- 363
