1 **Reasons underlying the intention to vaccinate children aged 5-11 against COVID-19: A**  
2 **cross-sectional study of parents in Israel, November 2021**

3  
4 **Authors:**

5 Nicole G. Morozov<sup>1</sup>, Amiel A. Dror<sup>2,3\*</sup>, Amani Daoud<sup>2,3</sup>; Netanel Eisenbach<sup>2,3</sup>; Edward  
6 Kaykov<sup>3,4</sup>; Masad Barhoum<sup>5</sup>; Tsvi Sheleg<sup>5</sup>; Eyal Sela<sup>2,3</sup>; Michael Edelstein<sup>3</sup>

7  
8 \*Morozov and Dror are equal first authors

9  
10 <sup>1</sup>Tel Aviv University, Tel Aviv, Israel

11 <sup>2</sup>Department of Otolaryngology, Head and Neck Surgery, Galilee Medical Center, Nahariya,  
12 Israel

13 <sup>3</sup>Azrieli Faculty of Medicine, Bar-Ilan University, Safed, Israel

14 <sup>4</sup>Geriatric Medicine Department, Galilee Medical Center, Nahariya, Israel

15 <sup>5</sup>Galilee Medical Center, Nahariya, Israel

16  
17 \*Corresponding author: Amiel A. Dror, Department of Otolaryngology, Head and Neck Surgery,  
18 Galilee Medical Center, Nahariya, Israel; Azrieli Faculty of Medicine, Bar-Ilan University,  
19 Safed, Israel Tel: +972544530534; email: amieldror@gmail.com

20

21

22

23

24 **Abstract**

25 Vaccination is a key tool to mitigate impacts of the COVID-19 pandemic. In Israel, COVID-19  
26 vaccines became available to adults in December 2020 and to 5–11-year-old children in  
27 November 2021. Ahead of the vaccine roll-out in children, we aimed to determine whether  
28 surveyed parents intended to vaccinate their children and describe reasons for their intentions.  
29 We collected information on parental socio-demographic characteristics, COVID-19 vaccine  
30 history, intention to vaccinate their children against COVID-19, and reasons for parental  
31 decisions using an anonymous online survey. We identified associations between parental  
32 characteristics and plans to vaccinate children using a logistic regression model and described  
33 reasons for intentions to vaccinate or not. Parental non-vaccination and having experienced  
34 major vaccination side effects were strongly associated with non-intention to vaccinate their  
35 children (OR 0.09 and 0.18 respectively,  $p < 0.001$ ). Parents who were younger, lived in the socio-  
36 economically deprived periphery, and belonged to the Arab population had lower intentions to  
37 vaccinate their children. Reasons for non-intention to vaccinate included concerns about vaccine  
38 safety and efficacy (53%, 95%CI 50-56) and the belief that COVID-19 is a mild disease (73%,  
39 95%CI 73-79), while a frequent motive for vaccination was the return to normal social and  
40 educational life (89%, 95%CI 87-91). Understanding rationales for COVID-19 vaccine rejection  
41 or acceptance, as well as parental demographic data, can pave the way for intentional educational  
42 campaigns to encourage not only vaccination against COVID-19, but also regular childhood  
43 vaccine programming.

44

45 **Keywords:** COVID-19; vaccine hesitancy; childhood vaccines; parental vaccine hesitancy;  
46 COVID-19 and children

47

## 48 **Highlights**

- 49 • Parental intention to vaccinate children aged 5-11 is much lower than vaccine coverage in  
50 parental age groups
- 51 • Being unvaccinated and having experienced side effects following vaccination were the  
52 greatest negative predictors in parents of intention to vaccinate their children
- 53 • Parents were more likely to accept a COVID-19 vaccine for their children to allow them  
54 to return to daily social life and to ensure economic security in the family
- 55 • Parents were more likely to reject a COVID-19 vaccination for health reasons such as  
56 safety concerns or due the belief that COVID-19 was a mild disease in children

57

## 58 **Introduction**

59

60 The rapid, global spread of COVID-19, an infection caused by the SARS-CoV-2 virus, spurred  
61 the expeditious development of several vaccines and the eventual implementation of vaccine  
62 programs at record speeds. In Israel, COVID-19 vaccines became available in December 2020  
63 for adults and eligibility gradually extended to younger ages. Teenagers aged 12-15 became  
64 eligible in June 2021 and children aged 5-11 in November 2021. Most high-income countries  
65 now offer teenage vaccination, but vaccination of younger children is less common despite  
66 evidence of its safety and effectiveness<sup>1</sup>. Outside of Israel, the United States' (USA) Centers for  
67 Disease Control and Prevention (CDC) recommends vaccination in the 5-11 age group while the  
68 European Centre for Disease prevention and Control has also recommended considering  
69 universal vaccination in this demographic<sup>2,3</sup>.

70  
71 The short period between the pandemic's onset and vaccine availability has added additional  
72 challenges for vaccine acceptance among the public <sup>4</sup>. Almost two years after the onset of the  
73 pandemic and one year after the first administration of COVID-19 vaccines in adults, the USA's  
74 Food and Drug Administration (FDA) approved the Pfizer/BioNTech mRNA vaccine for 5- to  
75 11-year-old children <sup>1, 5</sup>. Studies conducted in the UK, USA, and Canada suggest that many  
76 parents remain concerned about the vaccine's side effects and safety, leading parents to be  
77 hesitant to administer the COVID-19 vaccine to their children <sup>6-8</sup>. While new research has  
78 examined the reasons why parents would be motivated or hesitant to vaccinate their children in  
79 Israel, ours is one of the first to examine attitudes of parents to children aged 5-11.

80  
81 Demographic criteria which have been associated with higher rates of vaccine refusal for  
82 children include younger parental age, non-white or minority ethnicity, lower education level,  
83 history of vaccination non-compliance to recommended childhood vaccinations, and lower  
84 income in countries such as England, Canada, and Brazil <sup>7, 9-11</sup>. Parents concerned about future  
85 finances were more likely to accept a vaccination for their offspring <sup>11</sup>. Larson et al. utilized a  
86 four-question survey across emergency departments in 2016 to uncover the differing beliefs  
87 towards vaccine safety across 67 countries, finding that vaccine safety skepticism relied on both  
88 the specific vaccine type and the country itself <sup>12</sup>. Compared with most high-income countries,  
89 Israel typically achieves high coverage for routine childhood vaccines. The 2020 national  
90 coverage for the first MMR dose among 24-month-olds was 99% in Israel vs 91% in the United  
91 States and in the UK <sup>13</sup>. Of note, Arab Israelis typically achieve higher coverage for routine  
92 childhood vaccines compared with the general population <sup>14</sup>. It is, therefore, important to

93 understand and document attitudes to COVID-19 vaccinations due to their implications for  
94 planning public health interventions.

95  
96 We aimed to investigate the intentions of surveyed parents in Israel to vaccinate their 5-11-year-  
97 old children against COVID-19 and the underlying reasons for their intentions. We sought to  
98 determine what common reasons parents listed for accepting or rejecting vaccinating their  
99 children. Our survey was initiated two weeks before children in this age group became eligible  
100 for COVID-19 vaccination.

101

## 102 **Methods**

103

### 104 **Study design**

105

106 This study was designed as a cross sectional survey to understand the willingness of surveyed  
107 parents of children 5-11 years old to vaccinate their children against COVID-19 and the reasons  
108 for their acceptance or refusal of the vaccine using an online questionnaire in Hebrew and  
109 Arabic. The survey was distributed through social media channels (Facebook and Twitter).  
110 Participants voluntarily participated in the survey. Eligibility criteria for inclusion in this study  
111 included whether the participant is a parent and if the parent has a child between the ages of five  
112 and 11. Appendix 1 provides an example in English of the study with the goal of the survey to  
113 determine eligibility for inclusion into our study, to obtain demographic data of the participant,  
114 and to establish the participant's intention to vaccinate their 5–11-year-old children. Informed  
115 consent was requested on the introductory page of the online questionnaire, prior to survey

116 enrollment. The anonymous web-based survey followed the American Association for Public  
117 Opinion Research (AAPOR) reporting guidelines<sup>15</sup>. The survey was anonymous and no  
118 identifiable information such as name, date of birth, or identification was collected. Participants  
119 were permitted to terminate participation at will. Approval of this study was granted by the  
120 Research Ethics Committee of the Galilee Medical Center. The questionnaire was designed and  
121 distributed using Qualtrics (Qualtrics, Provo, UT, United States of America).

122  
123 The survey was distributed between November 1-14, 2021, spanning over 14 days and  
124 terminating one day before the planned opening of COVID-19 vaccinations to 5-11-year-old  
125 children in Israel. The outreach to popular social media channels in Israel was conducted through  
126 Facebook, Instagram, and Twitter advertisement platforms. To encourage participation from a  
127 wide range of individuals representing Israeli society, we used advertisement sets in both Arabic  
128 and Hebrew and tailored to males and females. We used the social media channel's advertising  
129 algorithm to target parents of young children. Only respondents who were older than 18 years,  
130 were parents of children aged 5-11, lived in Israel, and who completed the survey were included  
131 in this study. The survey was distributed evenly in all geographic regions of Israel. The  
132 advertisement invitation to participate in our survey included a direct callout with the phrase  
133 "Can you help us to understand parent intention to vaccinate children for COVID-19" followed  
134 by "Voluntary survey to study parents' intention to vaccinate children aged 5-11 for COVID-  
135 19". The impression segmentation and click conversion rate are described in Figure 1.

136

### 137 **Survey Instrument**

138

139 The survey had two sections: The first section included nine questions about socio-demographic  
140 characteristics of the participating parents including parental age, gender, area of residence,  
141 household composition, number of children, ethnicity, parental education, parental COVID-19  
142 vaccination status, and self-reported side effects from the vaccine (major, mild, or no symptoms),  
143 and one question on intention to vaccinate their child(ren) against COVID-19.

144  
145 In the second section, responders who indicated they were not intending to vaccinate their  
146 children against COVID-19 were asked to state their reasons from a list of predefined  
147 explanations, and those who indicated intention to vaccinate were also asked to affirm why from  
148 a list of potential reasons. A free text answer was also provided.

149  
150 The full questionnaire is available in Appendix 1. The estimated answering time for completing  
151 the survey was under two minutes.

152  
153 **Statistical analysis**

154  
155 We calculated the proportion of parents intending to vaccinate their children together with 95%  
156 confidence intervals, overall and in each stratum. We calculated that in order to detect a 5%  
157 difference in response between vaccination intenders and non-intenders with an alpha of 0.05  
158 and a power of 80%, 1531 participants were required. We compared parents who intended to  
159 vaccinate their children to those who did not in terms of all socio-demographic factors recorded  
160 in the questionnaire using a univariate logistic regression model. To determine the extent to  
161 which each factor was an independent predictor, we conducted a multivariate logistic regression

162 analysis adjusting for all other factors found to be statistically significant (at the  $\alpha=0.05$   
163 level) in the univariate analysis. We also calculated the proportion of parents giving each reason  
164 for intending or not intending to vaccinate together with 95% confidence intervals.

165

166 Data were prepared using Microsoft Excel and analyzed using STATA 15.

167

## 168 **Results**

169

170 We received 1837 responses to our survey, published online between November 1-14, 2021. Of  
171 those, 1514 (82.4%) completed the survey in its entirety. The distribution of responders  
172 according to age, sex, ethnicity, education level, and other demographic criteria is described in  
173 Table 1. In our study parental self-reported ethnicity was 70.7% Jewish, 25.5% Arab, and 3.8%  
174 “other”. In the general population these proportions, as of December 2021 were, 73.9% , 21.1%  
175 is Arab, and 5.0% respectively.<sup>16</sup> Overall intention to vaccinate was 44% (95% CI 41.3-45.9).

176

177 Female parents and parents above the age of 35 were more likely to vaccinate than male parents  
178 and parents aged 35 and younger (47% vs. 40%,  $p<0.002$ ; 45% vs. 39%,  $p<0.02$ , Table 1).

179 Compared with non-Arab Israeli parents, Israeli Arab parents reported a lower intention to  
180 vaccinate their children (34% vs. 47%,  $p<0.001$ , Table 1). Other parental factors significantly  
181 associated with a lower intention to vaccinate included having a single child, living in the  
182 periphery (Northern or Southern, socioeconomically depressed regions of the country), having  
183 received fewer than three doses of a COVID-19 vaccine and having experienced major side  
184 effects of COVID-19 vaccination. After adjusting for other factors, being male, living in the



185 periphery, belonging to the Arab population, reception of fewer than three doses of the COVID-  
186 19 vaccine and having experienced major side effects following COVID-19 vaccination all  
187 remained significantly associated with a lower intention to vaccinate children (Table 1). Being  
188 completely unvaccinated and having suffered major side effects were associated with the largest  
189 reduction in intention to vaccinate children (-91% and -81% respectively,  $p < 0.001$ ).

190  
191 Of 801 parents intending to vaccinate their children, 93% were COVID-19 vaccinated at least  
192 once. Intention to vaccinate their children increased with the number of doses the parents had  
193 received; while only 13% of unvaccinated parents intended to vaccinate their children against  
194 COVID-19, 32% of parents vaccinated with one dose, 48% of parents vaccinated with two doses,  
195 and 62% of parents vaccinated with three doses were willing to vaccinate their children  
196 ( $p < 0.001$ , Table 1).

197  
198 The most often cited reason for choosing to vaccinate their children was to allow their children to  
199 return to everyday social, educational, and financial life, followed by protecting other family  
200 members from COVID-19 infection (89 and 77.9% respectively, Table 2). The protection of the  
201 children against viral COVID-19 infection followed by vaccine safety were the least often  
202 mentioned explanations for parents who intended to vaccinate their children (37.9%).

203  
204 The most frequently mentioned explanation for not vaccinating their children is the belief that  
205 COVID-19 leads to mild or asymptomatic disease in children (76.1%, Table 2). Concerns of the  
206 parents regarding vaccine safety were ordered second in their consideration not to vaccinate their  
207 children (53.1%, Table 2).

208

209 **Discussion**

210

211 Routine childhood vaccination offers the prospect of protection against infectious diseases. In  
212 most settings, there is no ongoing endemic transmission of poliovirus, measles, or diphtheria  
213 infections due to effective global vaccination campaigns<sup>17-19</sup>. However, COVID-19 is unique in  
214 several ways: first, the pandemic is continuing to develop and therefore vaccine protection is  
215 against an immediate and tangible threat; second, the volume and availability of information  
216 around COVID-19 vaccines, offering arguments both for and against vaccination with very few  
217 verification pathways for parents to assess the accuracy of the information they are accessing, is  
218 an unprecedented phenomenon; third, the speed at which COVID-19 vaccines were developed have  
219 raised some concerns about safety among the general public; fourth, the shifting understanding  
220 that the purpose of the COVID-19 vaccines, including mRNA vaccines, is not to prevent  
221 infection but rather to decrease the likelihood of severe adverse outcomes<sup>20,21</sup>.

222

223 Existing research has established several factors which may influence vaccine acceptance,  
224 including the type of vaccine, home country of the individual, religiosity, age, and other socio-  
225 demographic criteria<sup>7,9-11</sup>. These links were studied also in association with the global outbreak  
226 of the H1N1 influenza pandemic of 2009-2010. According to a World Health Organization  
227 systematic review report in 2016 of attitudes towards vaccination during this particular influenza  
228 pandemic, parents of children aged 6-59 months were less likely to accept a vaccine for their  
229 children if the parents were younger and had a lower educational achievement<sup>22</sup>. The most cited  
230 reasons for hesitancy, during the 2009-10 influenza pandemic, included a decreased perception

231 of benefit from the influenza vaccine, decreased perception of danger from the virus, and  
232 difficulties with ease of access to vaccination<sup>22</sup>. Similarly, we found that the most commonly  
233 held reason by surveyed parents to not vaccinate their children is the belief that the disease is  
234 mild or asymptomatic in children.

235  
236 The COVID-19 pandemic has seen the digital spread of information, misinformation, and  
237 disinformation on social media platforms on an unprecedented scale<sup>23</sup>. Mistrust in government  
238 and international health organizations has been suggested as a potential contributor to hesitancy  
239 to follow government and international health guidelines, as fewer than 30% of individuals opted  
240 to search for their own government social media publications for vaccine information and  
241 guidance<sup>24</sup>. Demographic data from social media sites shows that the largest user age groups of  
242 social media sites such as Facebook, Instagram, and YouTube are ages up to 35 years old<sup>25</sup>. Our  
243 results indicate that parents younger than 35, the greatest social media users, were less likely to  
244 vaccinate their children.

245  
246 Of additional importance in the discussion of COVID-19 vaccine hesitancy is whether an  
247 individual has experienced adverse effects attributed to the vaccine. Parental experience was  
248 clearly a key factor in the decision, with unvaccinated, surveyed parents and those who  
249 experienced perceived severe side effects very unlikely to vaccinate their children. Vaccine  
250 hesitant individuals who experienced an adverse effect attributed to a vaccine did receive the  
251 vaccine, indicating a likely initial willingness to be vaccinated but subsequent hesitancy based on  
252 experience. Acknowledging these experiences while correcting potential factual misconceptions  
253 regarding vaccine safety may be a technique to assuage concerned parents, as suggested by a

254 clinical report from The American Academy of Pediatrics <sup>26</sup>. Healthcare providers may be better  
255 prepared to repair their trust in vaccines in the future, thus paving the way for parents to have  
256 greater trust in vaccines and subsequent willingness to vaccinate their children.

257  
258 We found that the intention to vaccinate children aged 5-11 was low, overall. Less than half of  
259 surveyed parents intended to vaccinate their 5-11 children, and as of February 2022 just over  
260 20% had vaccinated their offspring <sup>27</sup>. Even among parents who had received three doses of the  
261 vaccine, intention to vaccinate was only 62%. This is consistent with experience from other  
262 countries where vaccinated parents did not intend to vaccination their children <sup>28</sup>. Data from a  
263 separate study, available online but not yet in a peer-reviewed publication, conducted at the same  
264 time showed that, similar to our results, only 37% of parents intended to vaccinate their children  
265 <sup>29</sup>. An Israeli study conducted prior to the initiation of ours found that Israeli parents of children  
266 of any age, with a bachelor's degree, were found to have higher rates of vaccination <sup>30</sup>. In  
267 contrast, we found that higher educational attainment did not reflect higher vaccination levels;  
268 the differences in these findings may be related to the age of parents. While the parents in our  
269 study had at least one child in the 5-11-year-old range, the parents in Heller et al.'s investigation  
270 were not necessarily parents to children in that age bracket.

271  
272 Our study has highlighted that the main reasons for intending to vaccinate children were not  
273 biomedical. Key factors within Israeli society associated with an increased intention to vaccinate  
274 children against COVID-19 include the parent's desire for the child to return to normal social  
275 and educational life along with secondary motives such as the parent's desire to maintain job  
276 security. Our findings suggest that, for COVID-19, the traditional perception of vaccination

277 benefits such as protection against severe illness has been superseded by indirect benefits such as  
278 returning to regular societal life and education institutions, as well as assuring financial resilience  
279 for the family. While this finding is not surprising considering the severe disruption to normal  
280 life caused by the COVID-19 pandemic, it is not clear whether this perception of the societal  
281 utility of vaccines will continue to impact the perception of other vaccines beyond the pandemic.

282  
283 The main drivers against intention to vaccinate are more biomedical, encompassing beliefs that  
284 COVID-19 causes a mild disease course in children and concerns about vaccine safety. Heller et  
285 al. found vaccine hesitancy to be greater among respondents who did not believe COVID-19  
286 vaccines are safe, with those who believe it is safe having higher rates of vaccination <sup>30</sup>.  
287 Interestingly, the results of their study, which was able to demonstrate longitudinal attitudes  
288 towards COVID-19 and vaccination, indicated a decreasing fear of COVID-19 and a greater  
289 distrust in vaccines <sup>30</sup>. Despite that finding, Heller et al. discovered that a greater proportion of  
290 respondents who had initially been worried about vaccine safety were vaccinated over the  
291 study's time period, a finding which may suggest a change in policy and incentives or education  
292 about vaccines <sup>30</sup>. These findings have implications for health promotion and communication  
293 campaigns; ensuring parents' confidence in the safety of the vaccine and highlighting the  
294 sociocultural benefits of vaccination may be key in guiding communities to higher levels of  
295 vaccine uptake.

296  
297 Groups who may be targets for intersectional outreach include minorities, parents with a lower  
298 educational level, and families in lower financial brackets as these parents have been highlighted  
299 as more likely to be vaccine hesitant <sup>10, 31</sup>. Our research found that Arab parents were less likely

300 to vaccinate their children as compared to other parents, consistent with research finding a higher  
301 rate of COVID-19 vaccine hesitancy among minority communities in other countries, as well as  
302 in Israel's Arab and Ultra-Orthodox communities <sup>7, 32, 33</sup>.

303  
304 Strategies to reduce vaccine hesitancy have been discussed in other literature. Financial or other  
305 incentivizing techniques for parents have been shown to increase vaccine uptake among their  
306 children in certain communities such as in Nicaragua and India <sup>34</sup>. A major motivator for vaccine  
307 uptake in our study is a desire to return to normal social and educational life in Israel, which is an  
308 incentive in and of itself. Use of technology and social marketing has also been shown to  
309 increase vaccine acceptance for HPV and MMR vaccines <sup>34</sup>. Digital health education  
310 interventions specific to parental concerns, such as about vaccine technologies, may be key to  
311 targeting certain parental groups.

312  
313 The key limitation of our study is inherent to its design and concerns the self -selected nature of  
314 the sample.. Parents who do not use social media channels, and therefore would not have been  
315 exposed to this study, may not have been appropriately represented. Although use of social  
316 media use is widespread in parental age groups in Israel, certain groups, for example the Ultra-  
317 Orthodox, may be underrepresent due to lower smartphone and Internet penetration <sup>35</sup>. Because  
318 the survey is entirely anonymous, comparisons between the sample and the general population  
319 are difficult. Nevertheless, the ethnicity distribution of respondents was comparable to the  
320 general population. Another potential selection bias is that individuals who have stronger  
321 opinions either for or against vaccinating their children for COVID-19 may be more likely to  
322 complete a questionnaire about the topic. It is also theoretically possible for individuals to have

323 completed the study more than once given that identifying participant information was not  
324 collected. It must be noted that the age, sex, ethnicity, and geographical distribution of  
325 participants suggest that all segments of the population were represented.

326  
327 It is not clear to what extent our findings are generalizable to other countries. Globally, there are  
328 wide discrepancies in vaccine uptake from one country to another with some countries enjoying  
329 remarkably low levels of vaccine hesitancy among parents <sup>9, 11</sup>. Understanding what factors  
330 enable childhood COVID-19 vaccination in countries with high parental intent and transferring  
331 this knowledge to other contexts could help countries struggling with COVID-19 childhood  
332 vaccination programs. Because a growing number of individuals, including parents, are seeking  
333 health and vaccine information online or through peers, the availability of trustworthy sources  
334 and early educational campaigns cannot be overstated <sup>36</sup>.

335

## 336 **Conclusion**

337  
338 The availability of COVID-19 vaccines and licensing of these vaccinations for use in children  
339 aged five to 11 is not a guarantee that parents will inoculate their children. Our study showed that  
340 intention to vaccinate 5- to 11-year-old children was low even among fully vaccinated parents,  
341 with socio-cultural factors, as well as vaccination experience in parents, being associated with  
342 intention to vaccinate their children. Our study showed that indirect benefits of vaccination such  
343 as returning to regular societal activities, including educational institutions and personal  
344 economic stability, were bigger motivators than direct protection against the virus, while the  
345 most common reasons for intending not to vaccinate children against COVID-19 were classical

346 biomedical concerns such disease severity and vaccine safety. These findings are important for  
347 health authorities to shape educational and communication campaigns: focusing on the message  
348 that vaccines protect against COVID-19 may not be as effective as messages stating that  
349 vaccines will allow children to go to school and adults to work. Different messaging campaigns  
350 should be implemented and evaluated to test this possibility.

351

352 **Conflicts of interest:** The authors declare no conflicts of interest.

353

354 **Attestation:** All authors attest they meet the ICMJE criteria for authorship

355

356 **Data availability statement:** Data is available upon request from the corresponding author.

357

### 358 Citations

- 359 1. Walter EB, Talaat KR, Sabharwal C, Gurtman A, Lockhart S, Paulsen GC, et al.  
360 Evaluation of the BNT162b2 Covid-19 Vaccine in Children 5 to 11 Years of Age. *New England*  
361 *Journal of Medicine* 2021.
- 362 2. Control ECfDPa. Interim public health considerations for COVID-19 vaccination of  
363 children aged 5-11 years. Stockholm: European Centre for Disease Prevention and Control,  
364 2021.
- 365 3. <https://www.cdc.gov/vaccines/covid-19/planning/children.html> CC-VfC-  
366 YOICfDCaPcDAf.
- 367 4. Soares P, Rocha JV, Moniz M, Gama A, Laires PA, Pedro AR, et al. Factors Associated  
368 with COVID-19 Vaccine Hesitancy. 2021; 9:300.
- 369 5. Woodworth KR, Moulia D, Collins JP, Hadler SC, Jones JM, Reddy SC, et al. The  
370 Advisory Committee on Immunization Practices' Interim Recommendation for Use of Pfizer-  
371 BioNTech COVID-19 Vaccine in Children Aged 5-11 Years - United States, November 2021.  
372 *MMWR Morb Mortal Wkly Rep* 2021; 70:1579-83.
- 373 6. Ruggiero KM, Wong J, Sweeney CF, Avola A, Auger A, Macaluso M, et al. Parents'  
374 Intentions to Vaccinate Their Children Against COVID-19. *Journal of Pediatric Health Care*  
375 2021; 35:509-17.
- 376 7. Bell S, Clarke R, Mounier-Jack S, Walker JL, Paterson P. Parents' and guardians' views  
377 on the acceptability of a future COVID-19 vaccine: A multi-methods study in England. *Vaccine*  
378 2020; 38:7789-98.



- 379 8. Humble RM, Sell H, Dubé E, MacDonald NE, Robinson J, Driedger SM, et al. Canadian  
380 parents' perceptions of COVID-19 vaccination and intention to vaccinate their children: Results  
381 from a cross-sectional national survey. *Vaccine* 2021; 39:7669-76.
- 382 9. Bagateli LE, Saeki EY, Fadda M, Agostoni C, Marchisio P, Milani GP. COVID-19  
383 Vaccine Hesitancy among Parents of Children and Adolescents Living in Brazil. *Vaccines* 2021;  
384 9.
- 385 10. McKinnon B, Quach C, Dubé È, Tuong Nguyen C, Zinszer K. Social inequalities in  
386 COVID-19 vaccine acceptance and uptake for children and adolescents in Montreal, Canada.  
387 *Vaccine* 2021; 39:7140-5.
- 388 11. Goldman RD, Krupik D, Ali S, Mater A, Hall JE, Bone JN, et al. Caregiver Willingness  
389 to Vaccinate Their Children against COVID-19 after Adult Vaccine Approval. *International*  
390 *Journal of Environmental Research and Public Health* 2021; 18.
- 391 12. Larson HJ, de Figueiredo A, Xiaohong Z, Schulz WS, Verger P, Johnston IG, et al. The  
392 State of Vaccine Confidence 2016: Global Insights Through a 67-Country Survey.  
393 *EBioMedicine* 2016; 12:295-301.
- 394 13. Organization WH. Measles vaccination coverage World Health Organization
- 395 14. Stein-Zamir C, Israeli A. Timeliness and completeness of routine childhood vaccinations  
396 in young children residing in a district with recurrent vaccine-preventable disease outbreaks,  
397 Jerusalem, Israel. *Euro surveillance : bulletin European sur les maladies transmissibles =*  
398 *European communicable disease bulletin* 2019; 24.
- 399 15. Transparency Initiative Disclosure Elements. American Association for Public Opinion  
400 Research, 2021.
- 401 16. Statistics CBo. Population of Israel on the Eve of 2022. In: Center SI, ed., 2021.
- 402 17. Obregón R, Chitnis K, Morry C, Feek W, Bates J, Galway M, et al. Achieving polio  
403 eradication: a review of health communication evidence and lessons learned in India and  
404 Pakistan. *Bulletin of the World Health Organization* 2009; 87:624-30.
- 405 18. Clarke KEN, MacNeil A, Hadler S, Scott C, Tiwari TSP, Cherian T. Global  
406 Epidemiology of Diphtheria, 2000-2017(1). *Emerging infectious diseases* 2019; 25:1834-42.
- 407 19. Holzmann H, Hengel H, Tenbusch M, Doerr HW. Eradication of measles: remaining  
408 challenges. *Medical microbiology and immunology* 2016; 205:201-8.
- 409 20. The Lancet Infectious D. The COVID-19 infodemic. *The Lancet Infectious diseases*  
410 2020; 20:875.
- 411 21. Salerno L, Craxì L, Amodio E, Lo Coco G. Factors Affecting Hesitancy to mRNA and  
412 Viral Vector COVID-19 Vaccines among College Students in Italy. *Vaccines* 2021; 9.
- 413 22. Organization WH. Barriers of influenza vaccination intention and behavior – A  
414 systematic review of influenza vaccine hesitancy. World Health Organization, 2016.
- 415 23. Goel A, Gupta L. Social Media in the Times of COVID-19. *Journal of clinical*  
416 *rheumatology : practical reports on rheumatic & musculoskeletal diseases* 2020; 26:220-3.
- 417 24. Volkmer I. Social Media and COVID-19: A global study of digital crisis interaction  
418 among Gen Z and millennials Melbourne, Australia: Wunderman Thompson, University of  
419 Melbourne, Pollfish and the World Health Organization, 2021.
- 420 25. Barnhart B. Social Media Demographics to Inform Your Brand's Strategy in 2022.  
421 Sprout Social: Sprout Social, 2022.
- 422 26. Edwards KM, Hackell JM. Countering Vaccine Hesitancy. *Pediatrics* 2016; 138.

- 423 27. Health IMo. Coronavirus in Israel - general situation  
424 2022;<https://datadashboard.health.gov.il/COVID-19/general>.
- 425 28. Horiuchi S, Sakamoto H, Abe SK, Shinohara R, Kushima M, Otawa S, et al. Factors of  
426 parental COVID-19 vaccine hesitancy: A cross sectional study in Japan. *PloS one* 2021;  
427 16:e0261121.
- 428 29. Heller O. What we can learn from Israel's COVID-19 vaccination of children. The  
429 Brookings Institution, 2021.
- 430 30. Heller O, Chun Y, Shlomo Y, Gewirtz-Meydan A, Acri M, Kulkarni S, et al. Public  
431 perceptions and the willingness to get vaccinated against COVID-19: Lessons from Israel.  
432 *Vaccine* 2022; 40:2053-61.
- 433 31. Alfieri NL, Kusma JD, Heard-Garris N, Davis MM, Golbeck E, Barrera L, et al. Parental  
434 COVID-19 vaccine hesitancy for children: vulnerability in an urban hotspot. *BMC Public Health*  
435 2021; 21:1662.
- 436 32. Robinson E, Jones A, Lesser I, Daly M. International estimates of intended uptake and  
437 refusal of COVID-19 vaccines: A rapid systematic review and meta-analysis of large nationally  
438 representative samples. *Vaccine* 2021; 39:2024-34.
- 439 33. Gorelik Y, Anis E, Edelstein M. Inequalities in initiation of COVID19 vaccination by age  
440 and population group in Israel- December 2020-July 2021. *The Lancet regional health Europe*  
441 2022; 12:100234.
- 442 34. Singh P, Dhalaria P, Kashyap S, Soni GK, Nandi P, Ghosh S, et al. Strategies to  
443 overcome vaccine hesitancy: a systematic review. *Systematic reviews* 2022; 11:78.
- 444 35. Silver L, Taylor, K. . Smartphone Ownership Is Growing Rapidly Around the World, but  
445 Not Always Equally. Pew Research Center, 2019.
- 446 36. Rhodes ME, Sundstrom B, Ritter E, McKeever BW, McKeever R. Preparing for A  
447 COVID-19 Vaccine: A Mixed Methods Study of Vaccine Hesitant Parents. *Journal of Health*  
448 *Communication* 2020; 25:831-7.
- 449

450

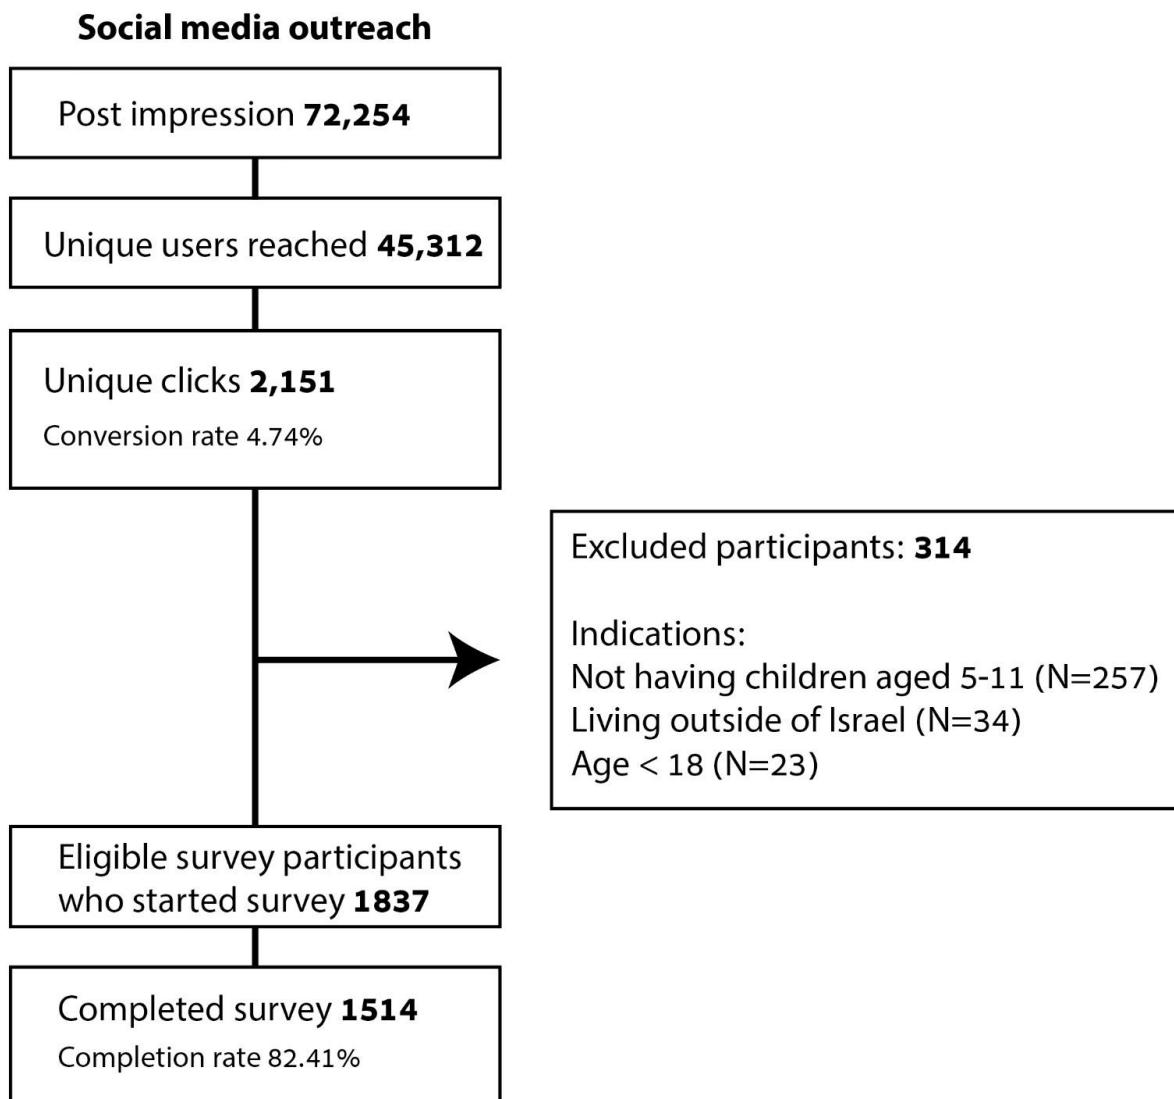

Figure 1: Social media outreach results, including initial post impressions, attrition, exclusion criteria, and conversion rate to clicks.
